# Supplementary material
Source: MDPI journal article supplement (https://www.mdpi.com/1424-8247/16/7/1034)
Supplement: s1 [file s1]

**Supplementary Table 1.** Antibodies dilutions and references.

| Antibody | Dilution | Reference   |
|----------|----------|-------------|
| GDAP1    | 1:25     | Proteintech |
| Tuj1     | 1:1000   | R&D         |
| Nestin   | 1:400    | Merck       |
| Olig2    | 1:200    | Abcam       |
